# Supplementary material for: Ag/diatomite for highly efficient solar vapor generation under one-sun irradiation
Source: Royal Society of Chemistry journal article supplement (doi:10.1039/c7ta05976k), 2017-01-01
Supplement: c7ta05976k1.pdf [file c7ta05976k1.pdf]

## Supporting Information

### **Ag/Diatomite for highly efficient solar vapor generation under one-sun irradiation**

Jing Fang, Qinglei Liu, Wang Zhang, Jiajun Gu\*, Yishi Su, Huilan Su, Cuiping Guo, and Di Zhang\*

*State Key Laboratory of Metal Matrix Composites, Shanghai Jiao Tong University, Shanghai 200240, China*

\*Correspondence and requests for materials should be addressed to J. J. G (gujiajun@sjtu.edu.cn) and D. Z. (zhangdi@sjtu.edu.cn)

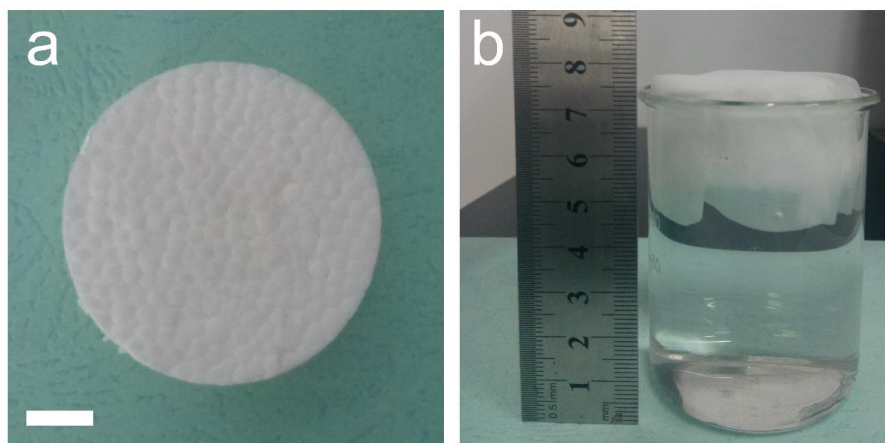

Figure S1. Digital images of (a) a polystyrene foam and (b) an airlaid paper wrapped around the polystyrene foam, floating on the surface of distilled water in a beaker (100 mL). Scale bar: 1 cm.

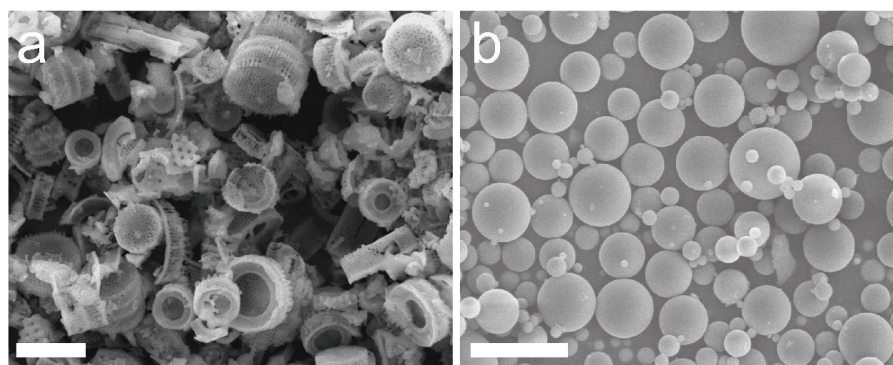

Figure S2. Low-magnification SEM images of (a) diatomite and (b) commercial SiO<sub>2</sub> spheres. Scale bars: 10  $\mu\text{m}$ .

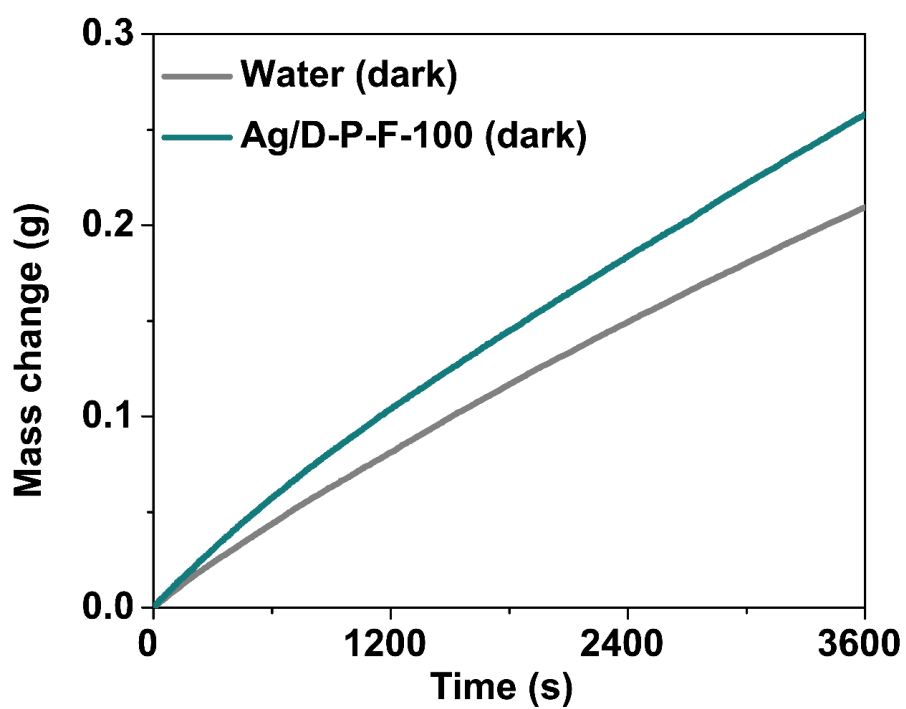

Figure S3. (a) The real-time water mass changes of Ag/D-P-F-100 and blank water without the vapor generation configuration under dark condition.
